# Supplementary material
Source: publisher figshare collection journal article supplement (https://acs.figshare.com/ndownloader/files/4045288)
Supplement: Supplementary file 1 [file 4045288]

# Rapid reversible superhydrophobicity-to- superhydrophilicity transition on alternating current etched brass

*Zhiwei Wang, Liqun Zhu, Weiping Li, Huicong Liu\**

(Key Laboratory of Aerospace Materials and Performance (Ministry of Education), School of Materials  
Science and Engineering, Beihang University, Beijing 100191, China)

\*E-mail address: wzw20051004@126.com; liuhc@buaa.edu.cn.

Tel: +86 1082317113. Fax: +86 1082317133.

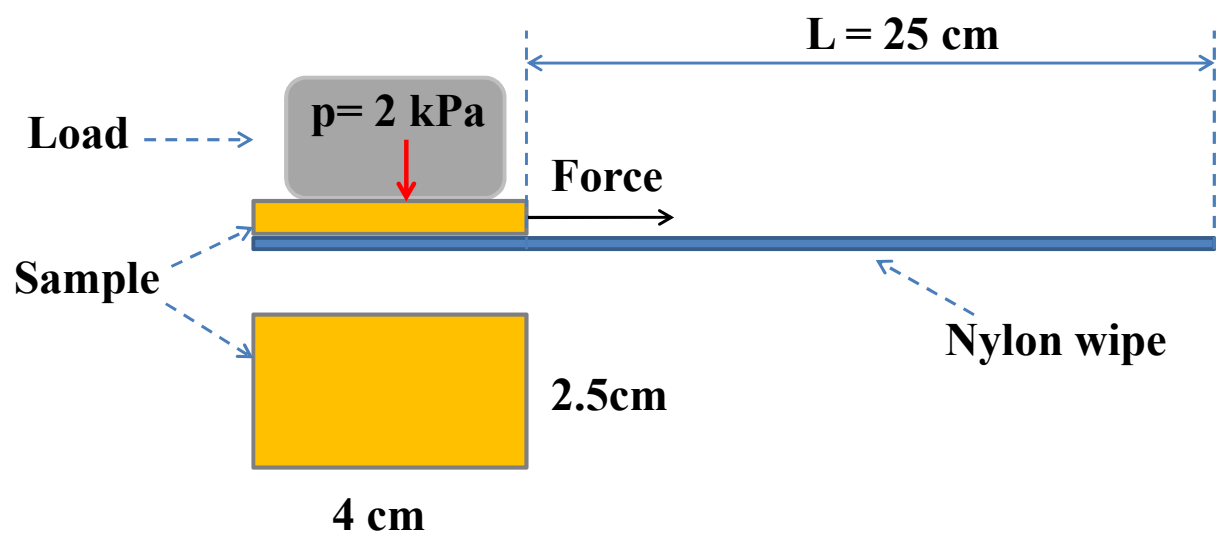

**Figure S1.** Schematic illustration of the abrasion test to evaluate the robustness of the modified annealed EB.

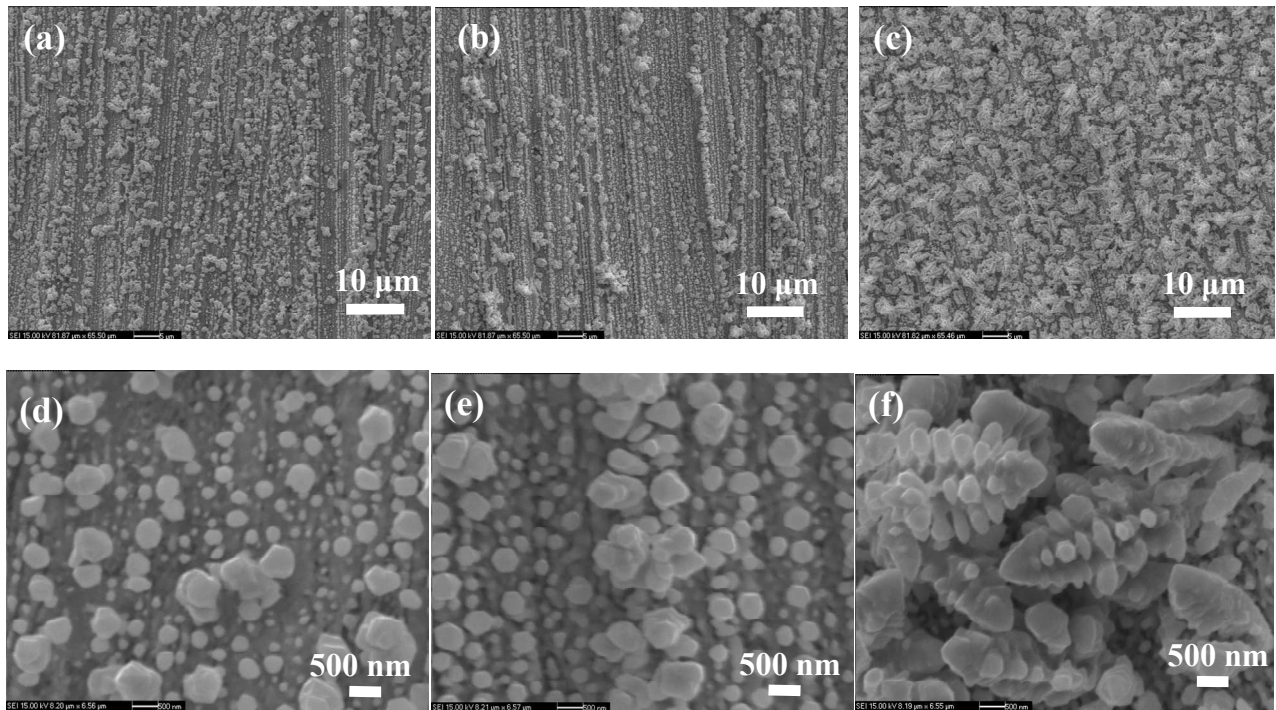

**Figure S2.** SEM images of etched brass with various concentrations of phosphoric acid: (a), (d) 0.1 M; (b), (e) 0.2M; (c), (f) 1.0M. (The etching duration is 5 min and the voltage is 20V.)

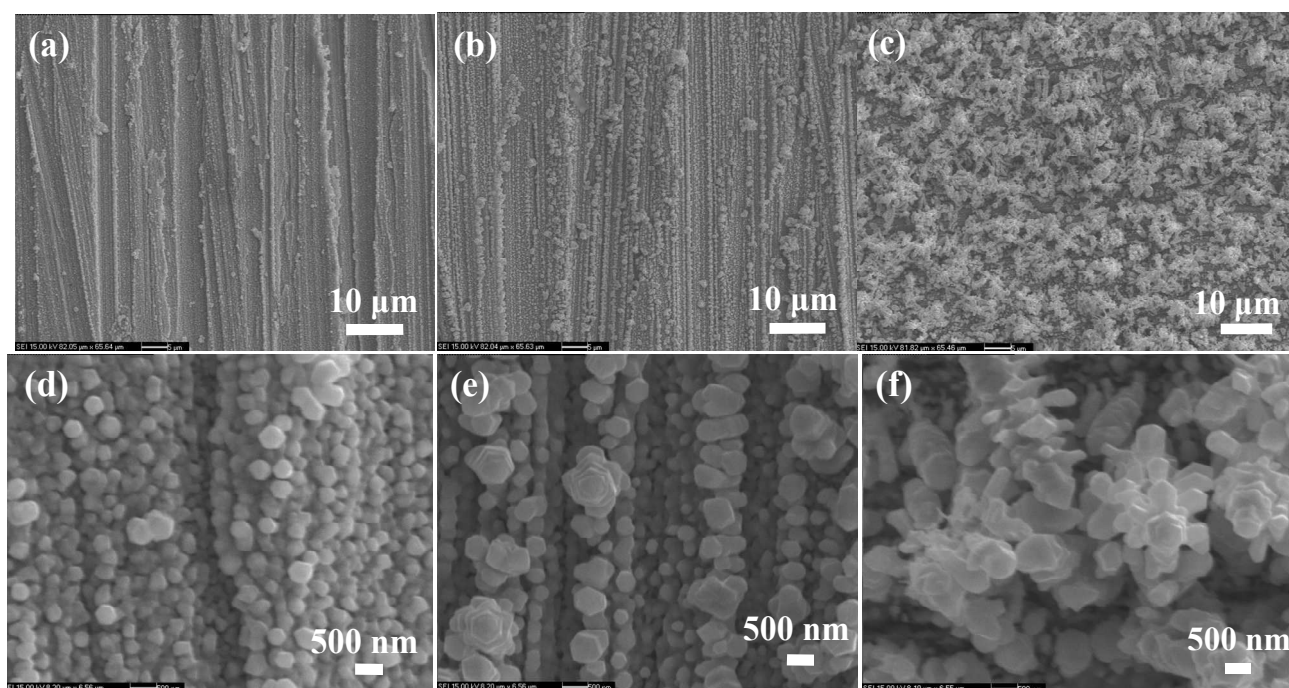

**Figure S3.** SEM images of etched brass with various AC etching voltage: (a), (d) 5 V; (b), (e) 10V; (e), (f) 25 V. (The etching duration is 5 min and the concentration of phosphoric acid is 0.5 M.)

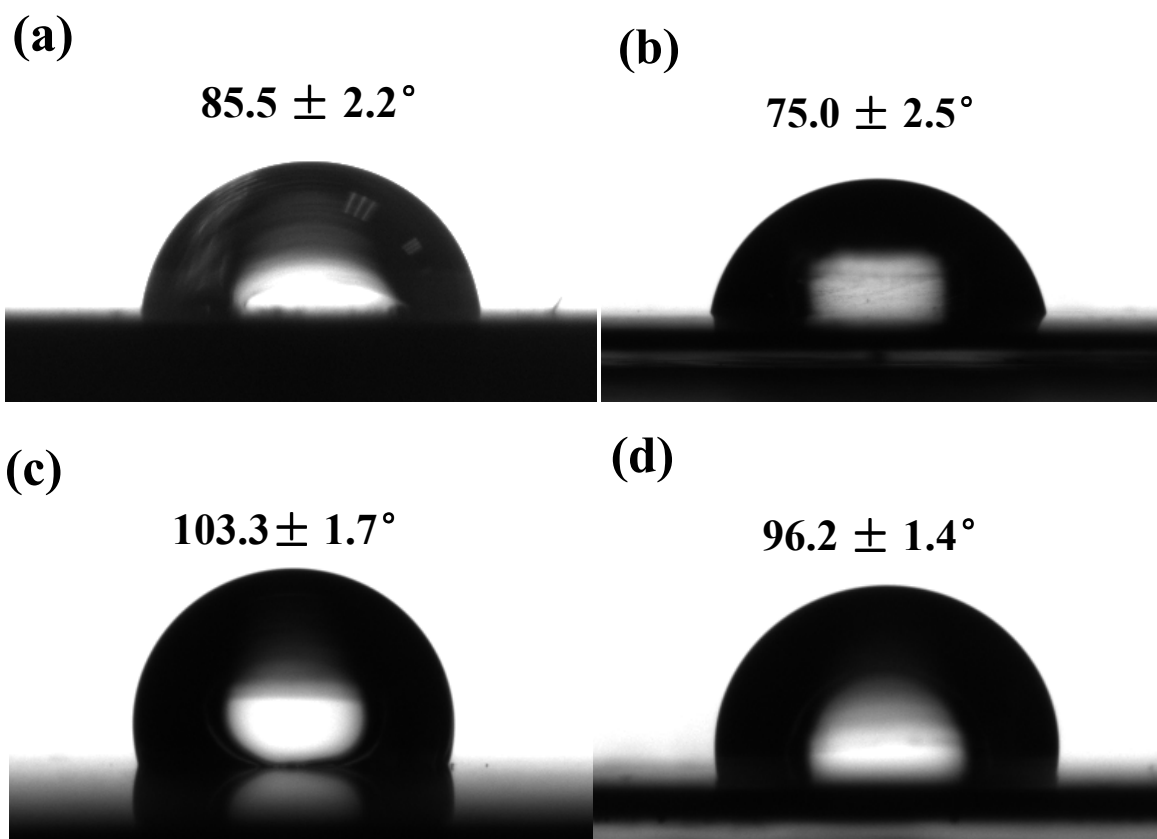

**Figure S4.** Images of 6  $\mu\text{L}$  water on the (a) smooth brass; (b) smooth copper and stearic acid modified (c) smooth brass; (d) smooth copper.
